# Supplementary material for: Characterization of vB_Kpn_F48, a Newly Discovered Lytic Bacteriophage for Klebsiella pneumoniae of Sequence Type 101
Source: MDPI journal article supplement (doi:10.3390/v10090482), 2018-09-09
Supplement: s1 [file s1]

Article

# Characterization of vB\_Kpn\_F48, a newly discovered lytic bacteriophage for *Klebsiella pneumoniae* of Sequence Type 101

Nagaia Ciacchi<sup>1,2</sup>, Marco Maria D'Andrea<sup>1,2</sup>, Pasquale Marmo<sup>1</sup>, Elisa Demattè<sup>3</sup>\*, Francesco Amisano<sup>4</sup>\*, Vincenzo Di Pilato<sup>5</sup>, Maurizio Fraziano<sup>1</sup>, Pietro Lupetti<sup>6</sup>, Gian Maria Rossolini<sup>5,7</sup>, Maria Cristina Thaller<sup>1</sup>\*

<sup>1</sup> Department of Biology, University of Rome "Tor Vergata", Rome, Italy

<sup>2</sup> Department of Medical Biotechnologies, University of Siena, Siena, Italy

<sup>3</sup> Center for Integrative Biology, CIBIO, University of Trento, Trento, Italy

<sup>4</sup> InBioS - Center for Protein Engineering, Department of Life Sciences, University of Liège, Sart-Tilman, Liège, Belgium

<sup>5</sup> Department of Experimental and Clinical Medicine, University of Florence, Florence, Italy

<sup>6</sup> Department of Life Sciences, University of Siena, Siena, Italy

<sup>7</sup> Clinical Microbiology and Virology Unit, Florence Careggi University Hospital, Florence, Italy

\* Correspondence: e-mail: thaller@uniroma2.it, mcthaller@gmail.com; Phone: +39-06-72595984.

• Research was conducted during a training period at the Department of Medical Biotechnologies, University of Siena, Siena, Italy.

Academic Editor: name

Received: date; Accepted: date; Published: date

## Supplemental material

**Table S1.** Primers used for the vB\_Kpn\_F48 genome characterization. For each primer the nucleotide sequence, the melting temperature (Tm) and the purpose are reported.

| Primer Name      | Sequence (5' - 3')      | Tm (°C) | Purpose           |
|------------------|-------------------------|---------|-------------------|
| F48_1F           | TTAAAGACGGGCAGATGGAC    | 57.3    | PCR/Sequencing    |
| F48_1R           | TCCTTCAGGCTGGCTATTTG    | 57.3    | PCR/Sequencing    |
| F48_2F           | GACCGTTCAATAAGGCAGAG    | 57.3    | PCR/Sequencing    |
| F48_2R           | CATTGTTACTCCTCCTGCTC    | 57.3    | PCR/Sequencing    |
| F48_3F           | TCTTCTTCAGAAAGCTCGGC    | 57.3    | PCR/Sequencing    |
| F48_3R           | GGGTTGACGGTATCGTTAAC    | 57.3    | PCR/Sequencing    |
| F48_4F           | TTTGGAAGCGTGTTCTAGC     | 57.3    | PCR/Sequencing    |
| F48_4R           | AGCTAAGAGTACTGGCGGTA    | 57.3    | PCR/Sequencing    |
| F48_5F           | AAACCCCGATTACTTGGGAC    | 57.3    | PCR/Sequencing    |
| F48_5R           | GACCAACGTGATGGTGATTG    | 57.3    | PCR/Sequencing    |
| F48_6F           | TAGTAGAAGTGTCAACCGCC    | 57.3    | PCR/Sequencing    |
| F48_6R           | TTCGCCGAAGATCTGCATAC    | 57.3    | PCR/Sequencing    |
| F48_7F           | CATTGAGAGAACCCATTGCG    | 57.3    | PCR/Sequencing    |
| F48_7R           | AAGAGGCTCGTTTCCAAGAC    | 57.3    | PCR/Sequencing    |
| F48_8F           | TAAGGCTGCTGATACATACCGC  | 60.2    | PCR/Sequencing    |
| F48_8R           | ATAAACATCATGGCGTCCGCG   | 59.8    | PCR/Sequencing    |
| F48_9F           | TAGGCATCGTTAGCTCCTACG   | 59.8    | PCR/Sequencing    |
| F48_9R           | ACGGACAGTAGTTTGGAACGC   | 59.8    | PCR/Sequencing    |
| F48_10F          | TAAACCAGGCGGTGACAGAAG   | 59.8    | PCR/Sequencing    |
| F48_10R          | ATGGATTAAGATTGGCCCTGTC  | 58.4    | PCR/Sequencing    |
| F48_11F          | TAACATTAGCCGTTACACCGC   | 57.8    | PCR/Sequencing    |
| F48_11R          | AATGGCGCTGTTGCTTGGAC    | 59.3    | PCR/Sequencing    |
| F48_12F          | TCCCTACACCAACAAATGGG    | 57.3    | PCR/Sequencing    |
| F48_12R          | AAGTCGTCTTCAAACGCAGGG   | 59.8    | PCR/Sequencing    |
| F48_13F          | TTATGCTCAAAGCTGCCGG     | 56.6    | PCR/Sequencing    |
| F48_13R          | AGACCCATTTGGCTTAACGC    | 57.3    | PCR/Sequencing    |
| F48_14F          | TAAGGACCGACTATGGCTTATAG | 58.8    | PCR/Sequencing    |
| F48_14R          | ATGCTTGCACCTTCTGGAGC    | 59.3    | PCR/Sequencing    |
| F48_TERM_FW      | TCAGGTGAAGAGCGTTTGTC    | 57.3    | Direct Sequencing |
| F48_TERM_REV     | TCGGCAGAGCTAATACCAAG    | 57.3    | Direct Sequencing |
| F48_INT_TERM_FW  | TTCATCCGTGCTAAACTGGG    | 57.3    | Direct Sequencing |
| F48_INT_TERM_REV | CCAGAGCCAAGATACGTTTC    | 57.3    | Direct Sequencing |

**Table S2.** General features of the coding regions of phage vB\_Kpn\_F48. For each predicted ORF the start and the stop positions, the predicted function of the encoded protein and its closest homolog found in INSDC databases, together with the degree of identity and coverage and the phage from which the ORF derived, are reported. The conserved protein domains detected in some protein, the associated accession numbers and the region in which a particular domain was found, are shown in the last column.

| CDS No | Start | Stop | Predicted Function   | Closest Protein Homolog   | Query cov (%) | ID (%) | Phage          | Conserved domains (from-to Accession (short name)) |
|--------|-------|------|----------------------|---------------------------|---------------|--------|----------------|----------------------------------------------------|
| 1      | 69    | 491  | Phage protein        | YP_009190702.1            | 100           | 74     | JD18           |                                                    |
| 2      | 540   | 1109 | hypothetical protein | YP_009288809.1            | 96            | 24     | vB_KpnM_KpV477 |                                                    |
| 3      | 1102  | 1467 | hypothetical protein | no significant similarity |               |        |                |                                                    |
| 4      | 1464  | 1766 | Phage protein        | YP_009190299.1            | 96            | 50     | PEi20          |                                                    |
| 5      | 1766  | 2041 | Phage protein        | YP_009190298.1            | 98            | 68     | PEi20          |                                                    |
| 6      | 2044  | 2268 | Phage protein        | YP_009190297.1            | 100           | 73     | PEi20          | 1-74 PHA02102 (PHA02102)                           |
| 7      | 2278  | 2514 | hypothetical protein | YP_009190296.1            | 93            | 68     | PEi20          |                                                    |
| 8      | 2563  | 2847 | hypothetical protein | YP_009146572.1            | 51            | 33     | Moon           |                                                    |
| 9      | 2837  | 3034 | Phage protein        | YP_009190294.1            | 96            | 62     | PEi20          |                                                    |
| 10     | 3165  | 3383 | hypothetical protein | no significant similarity |               |        |                |                                                    |
| 11     | 3380  | 4342 | Phage protein        | YP_009190292.1            | 99            | 82     | PEi20          |                                                    |
| 12     | 4733  | 4864 | hypothetical protein | no significant similarity |               |        |                |                                                    |
| 13     | 4923  | 5144 | hypothetical protein | YP_009190290.1            | 100           | 57     | PEi20          |                                                    |
| 14     | 5155  | 5844 | Phage protein        | YP_009190289.1            | 100           | 85     | PEi20          |                                                    |
| 15     | 5844  | 6254 | hypothetical protein | no significant similarity |               |        |                |                                                    |
| 16     | 6251  | 6550 | hypothetical protein | no significant similarity |               |        |                |                                                    |
| 17     | 6547  | 6849 | hypothetical protein | YP_009005395.1            | 100           | 41     | PG7            |                                                    |
| 18     | 6846  | 7292 | Nudix hydrolase,     | YP_009203850.1            | 99            | 67     | Merlin         | 4-86 cd02883 (Nudix_Hydrolase)                     |

|    |       |       |                                                                                       |                |     |    |               |                                                                                                                                                                                     |
|----|-------|-------|---------------------------------------------------------------------------------------|----------------|-----|----|---------------|-------------------------------------------------------------------------------------------------------------------------------------------------------------------------------------|
|    |       |       | phage-associated                                                                      |                |     |    |               | 4-62 pfam00293 (NUDIX)<br>8-95 COG0494 (MutT)<br>1-99 PRK10776 (PRK10776)<br>1-79 TIGR00586 (mutt)<br>37-61 PRK11762 (nudE)<br>37-60 TIGR02705 (nudix_YtkD)<br>39-60 COG2816 (NPY1) |
| 19 | 7324  | 7818  | T4-like phage<br>baseplate hub + tail<br>lysozyme                                     | YP_002854463.1 | 100 | 80 | RB14          | 3-161 cd00735<br>(bacteriophage_T4-like_lysozyme)<br>24-148 pfam00959 (Phage_lysozyme)<br>11-148 COG3772 (RrrD)<br>1-161 PHA02596 (5)                                               |
| 20 | 7805  | 8107  | Phage protein                                                                         | YP_009037382.1 | 100 | 94 | vB_EcoM_JS09  |                                                                                                                                                                                     |
| 21 | 8166  | 8573  | diguanylate<br>cyclase/phosphodiesterase (GGDEF & EAL domains) with PAS/PAC sensor(s) | YP_009203847.1 | 99  | 90 | Merlin        | 1-133 pfam03013 (Pyr_excise)                                                                                                                                                        |
| 22 | 8618  | 9190  | Phage protein                                                                         | YP_009290389.1 | 100 | 89 | vB_EcoM-UFV13 |                                                                                                                                                                                     |
| 23 | 9328  | 9681  | Phage protein                                                                         | YP_009324008.1 | 84  | 76 | MX01          |                                                                                                                                                                                     |
| 24 | 9755  | 10270 | Phage protein                                                                         | YP_002922458.1 | 100 | 51 | JS10          | 45-95 pfam13245 (AAA_19)<br>3-147 PHA02533 (17)                                                                                                                                     |
| 25 | 10270 | 10506 | hypothetical protein                                                                  | YP_009203845.1 | 83  | 62 | Merlin        |                                                                                                                                                                                     |

|    |       |       |                                  |                           |     |    |                |                                                                                                                                           |
|----|-------|-------|----------------------------------|---------------------------|-----|----|----------------|-------------------------------------------------------------------------------------------------------------------------------------------|
| 26 | 10508 | 10738 | hypothetical protein             | YP_009146562.1            | 97  | 56 | Moon           |                                                                                                                                           |
| 27 | 10728 | 10994 | Phage protein                    | YP_009190280.1            | 100 | 59 | PEi20          |                                                                                                                                           |
| 28 | 11103 | 11561 | Endoribonuclease, RegB protein   | YP_004009980.1            | 97  | 70 | CC31           | 4-150 pfam10715 (REGB_T4)                                                                                                                 |
| 29 | 11571 | 12110 | T4-like phage protein, T4 GC1559 | YP_009100652.1            | 98  | 73 | Shf125875      | 60-168 cd00254 (LT_GEWL)                                                                                                                  |
| 30 | 12460 | 12924 | Phage protein                    | YP_009146554.1            | 100 | 60 | Moon           | 1-154 PHA02595 (tk.4)<br>1-144 cd02901 (Macro_Poa1p_like)<br>4-137 smart00506 (A1pp)<br>21-137 pfam01661 (Macro)<br>20-137 COG2110 (YmdB) |
| 31 | 12924 | 13109 | hypothetical protein             | YP_009190274.1            | 100 | 54 | PEi20          | 5-58 pfam04748 (Polysacc_deac_2)                                                                                                          |
| 32 | 13099 | 13263 | hypothetical protein             | no significant similarity |     |    |                |                                                                                                                                           |
| 33 | 13253 | 13426 | hypothetical protein             | no significant similarity |     |    |                |                                                                                                                                           |
| 34 | 13426 | 14007 | Thymidine kinase (EC 2.7.1.21)   | YP_009286466.1            | 98  | 86 | vB_SnwM_CGG4-1 | 1-188 PRK04296 (PRK04296)<br>1-188 COG1435 (Tdk)<br>2-186 pfam00265 (TK)                                                                  |
| 35 | 14175 | 14387 | Phage protein                    | YP_009190676.1            | 100 | 64 | JD18           |                                                                                                                                           |
| 36 | 14396 | 14677 | hypothetical protein             | YP_009288785.1            | 100 | 54 | vB_KpnM_KpV477 | 23-85 PHA02054 (PHA02054)                                                                                                                 |
| 37 | 14664 | 15050 | Phage protein                    | YP_004009967.1            | 99  | 69 | CC31           | 1-127 PHA02604 (rl.-1)                                                                                                                    |
| 38 | 15141 | 15407 | hypothetical protein             | YP_009190268.1            | 97  | 52 | PEi20          |                                                                                                                                           |
| 39 | 15395 | 15580 | hypothetical protein             | YP_009190267.1            | 93  | 46 | PEi20          |                                                                                                                                           |
| 40 | 15621 | 15878 | Hypothetical                     | YP_009203821.1            | 100 | 82 | Merlin         | 1-70 PRK11019 (PRK11019)                                                                                                                  |

|    |       |       |                                   |                           |     |    |                    |                                                                                            |
|----|-------|-------|-----------------------------------|---------------------------|-----|----|--------------------|--------------------------------------------------------------------------------------------|
|    |       |       | Zinc-finger<br>containing protein |                           |     |    |                    | 35-66 TIGR02419 (C4_traR_proteo)<br>40-66 COG1734 (DksA)<br>39-66 pfam01258 (zf-dskA_traR) |
| 41 | 15875 | 16156 | Phage protein                     | YP_009146541.1            | 86  | 71 | Moon               |                                                                                            |
| 42 | 16188 | 16439 | hypothetical protein              | YP_009148086.1            | 85  | 43 | STML-198           |                                                                                            |
| 43 | 16442 | 16876 | hypothetical protein              | YP_004009960.1            | 100 | 36 | CC31               | 30-102 pfam14126 (DUF42939)<br>33-105 TIGR04286 (MSEP-CTERM)                               |
| 44 | 16873 | 17106 | hypothetical protein              | YP_009190666.1            | 89  | 42 | JD18               |                                                                                            |
| 45 | 17108 | 17629 | hypothetical protein              | YP_009190260.1            | 99  | 35 | PEi20              |                                                                                            |
| 46 | 17626 | 18636 | Thioredoxin,<br>phage-associated  | YP_009190259.1            | 100 | 85 | PEi20              | 1-336 PHA02603 (nrdC.11)<br>10-149 pfam10127 (Nuc-transf)                                  |
| 47 | 18694 | 18954 | hypothetical protein              | YP_009286454.1            | 89  | 36 | vB_SnwM_CGG4-<br>1 |                                                                                            |
| 48 | 19047 | 19199 | hypothetical protein              | no significant similarity |     |    |                    |                                                                                            |
| 49 | 19207 | 19665 | hypothetical protein              | YP_009190253.1            | 100 | 67 | PEi20              |                                                                                            |
| 50 | 19665 | 19841 | hypothetical protein              | no significant similarity |     |    |                    |                                                                                            |
| 51 | 19841 | 20158 | hypothetical protein              | YP_009323290.1            | 63  | 32 | WG01               |                                                                                            |
| 52 | 20291 | 20142 | hypothetical protein              | no significant similarity |     |    |                    |                                                                                            |
| 53 | 20593 | 21366 | hypothetical protein              | YP_009203806.1            | 100 | 69 | Merlin             |                                                                                            |
| 54 | 21366 | 21599 | hypothetical protein              | no significant similarity |     |    |                    |                                                                                            |
| 55 | 21596 | 22030 | hypothetical protein              | YP_004009942.1            | 95  | 79 | CC31               |                                                                                            |
| 56 | 22147 | 22314 | hypothetical protein              | no significant similarity |     |    |                    |                                                                                            |
| 57 | 22325 | 23272 | hypothetical protein              | YP_009190247.1            | 80  | 23 | PEi20              |                                                                                            |

|    |       |       |                                                                              |                           |     |    |              |                                                                                                                                                                                     |
|----|-------|-------|------------------------------------------------------------------------------|---------------------------|-----|----|--------------|-------------------------------------------------------------------------------------------------------------------------------------------------------------------------------------|
| 58 | 23269 | 23493 | Thioredoxin,<br>phage-associated                                             | YP_009190650.1            | 100 | 71 | JD18         |                                                                                                                                                                                     |
| 59 | 23490 | 23804 | hypothetical protein                                                         | YP_009190649.1            | 100 | 82 | JD18         |                                                                                                                                                                                     |
| 60 | 23801 | 24307 | Phage protein                                                                | YP_009289473.1            | 98  | 45 | PKO111       |                                                                                                                                                                                     |
| 61 | 24307 | 24606 | hypothetical protein                                                         | YP_009205777.1            | 52  | 58 | vB_EcoM_VR5  |                                                                                                                                                                                     |
| 62 | 24584 | 24847 | Thioredoxin,<br>phage-associated                                             | YP_009289200.1            | 100 | 74 | SHSML-52-1   | 14-84 cd03418 (GRX_GRXb_1_3_like)<br>14-84 TIGR02181 (GRX_bact)<br>14-84 PRK10638 (PRK10638)<br>14-76 pfam00462 (Glutaredoxin)<br>14-84 COG0695 (GrxC)<br>14-84 PRK12759 (PRK12759) |
| 63 | 24844 | 25011 | hypothetical protein                                                         | YP_009202812.1            | 96  | 45 | QL01         |                                                                                                                                                                                     |
| 64 | 25008 | 25196 | hypothetical protein                                                         | YP_008770398.1            | 58  | 44 | Spock        |                                                                                                                                                                                     |
| 65 | 25193 | 25510 | Phage protein                                                                | YP_009190240.1            | 100 | 61 | PEi20        |                                                                                                                                                                                     |
| 66 | 25627 | 26067 | Pin protease inhibitor                                                       | YP_009190238.1            | 100 | 34 | PEi20        | 2-139 pfam10465 (Inhibitor_I24)                                                                                                                                                     |
| 67 | 26103 | 26576 | Phage endonuclease<br>#T4-like phage gp49,<br>endonuclease VII #T4<br>GC1525 | YP_009213913.1            | 100 | 75 | vB_EcoM_VR26 | 1-97 pfam02945 (Endonuclease_7)<br>105-157 pfam09124 (Endonuc-dimeris)<br>1-157 PHA02565 (49)                                                                                       |
| 68 | 26692 | 26892 | hypothetical protein                                                         | no significant similarity |     |    |              |                                                                                                                                                                                     |
| 69 | 26889 | 27194 | Glutaredoxin                                                                 | YP_009190630.1            | 98  | 61 | JD18         | 3-79 pfam00462 (Glutaredoxin)<br>15-79 cd02066 (GRX_family)<br>1-79 COG0695 (GrxC)                                                                                                  |

|    |       |       |                                                                           |                |     |    |                |                                                                                                                                      |
|----|-------|-------|---------------------------------------------------------------------------|----------------|-----|----|----------------|--------------------------------------------------------------------------------------------------------------------------------------|
|    |       |       |                                                                           |                |     |    |                | 1-88 PRK11200 (grxA)<br>3-92 TIGR02183 (GRXA)                                                                                        |
| 70 | 27334 | 27513 | hypothetical protein                                                      | YP_009190232.1 | 98  | 52 | PEi20          |                                                                                                                                      |
| 71 | 27513 | 27770 | hypothetical protein                                                      | YP_009190231.1 | 97  | 30 | PEi20          |                                                                                                                                      |
| 72 | 27770 | 28054 | Phage protein                                                             | YP_009195480.1 | 100 | 50 | vB_PmiM_Pm5461 |                                                                                                                                      |
| 73 | 28128 | 28460 | Phage protein                                                             | YP_009146502.1 | 100 | 76 | Moon           |                                                                                                                                      |
| 74 | 28457 | 28738 | hypothetical protein                                                      | YP_009148051.1 | 74  | 36 | STML-198       |                                                                                                                                      |
| 75 | 28731 | 28958 | hypothetical protein                                                      | YP_004009918.1 | 90  | 54 | CC31           |                                                                                                                                      |
| 76 | 28955 | 29221 | hypothetical protein                                                      | YP_009190226.1 | 98  | 60 | PEi20          |                                                                                                                                      |
| 77 | 29288 | 29827 | T4-like phage RNA<br>polymerase sigma<br>factor for late<br>transcription | YP_009190621.1 | 100 | 86 | JD18           | 1-179 PHA02547 (55)                                                                                                                  |
| 78 | 29850 | 30041 | Phage protein                                                             | YP_009190620.1 | 98  | 68 | JD18           |                                                                                                                                      |
| 79 | 30043 | 30387 | Phage protein                                                             | YP_009288733.1 | 84  | 61 | vB_KpnM_KpV477 | 18-114 PHA02571 (a-gt.4)<br>38-107 pfam10849 (DUF2654)                                                                               |
| 80 | 30365 | 30562 | Phage protein                                                             | YP_009190221.1 | 100 | 71 | PEi20          |                                                                                                                                      |
| 81 | 30648 | 30833 | hypothetical protein                                                      | YP_009146494.1 | 100 | 69 | Moon           | 2-44 PHA00911 (21)                                                                                                                   |
| 82 | 30898 | 31920 | Phage<br>recombination-relate<br>d endonuclease Gp47                      | YP_009289495.1 | 99  | 81 | PKO111         | 2-87 cd00840 (MPP_Mre11_N)<br>1-116 TIGR00619 (sbcd)<br>1-340 PHA02546 (47)<br>1-340 COG0420 (SbcD)<br>1-104 pfam00149 (Metallophos) |



|    |       |       |                                                                                                  |                |     |    |                |                                                                                                                                                                                            |
|----|-------|-------|--------------------------------------------------------------------------------------------------|----------------|-----|----|----------------|--------------------------------------------------------------------------------------------------------------------------------------------------------------------------------------------|
| 83 | 31917 | 33599 | Phage recombination-related endonuclease Gp46                                                    | YP_009286413.1 | 100 | 77 | vB_SnwM_CGG4-1 | 1-138 cd03279 (ABC_sbcCD)<br>9-199 pfam13476 (AAA_23)<br>433-552 cd03279 (ABC_sbcCD)<br>4-560 PHA02562 (46)<br>5-391 COG0419 (SbcC)<br>1-409 TIGR00618 (sbcc)<br>21-403 pfam02463 (SMC_N)  |
| 84 | 33596 | 33793 | Phage protein                                                                                    | YP_009202786.1 | 95  | 63 | QL01           |                                                                                                                                                                                            |
| 85 | 33815 | 34189 | RNA polymerase, phage-associated                                                                 | YP_009190611.1 | 99  | 71 | JD18           | 7-117 pfam10789 (Phage_RpbA)                                                                                                                                                               |
| 86 | 34208 | 34912 | Sliding clamp DNA polymerase accessory protein, phage associated # T4-like phage gp45 #T4 GC0153 | YP_009190610.1 | 100 | 62 | JD18           | 115-226 pfam09116 (gp45-slide_C)<br>2-103 pfam02916 (DNA_PPF)<br>1-232 PHA02545 (45)                                                                                                       |
| 87 | 34958 | 35917 | Replication factor C small subunit / Phage DNA polymerase clamp loader subunit                   | YP_009289500.1 | 99  | 80 | PKO111         | 52-158 pfam00004 (AAA)<br>27-155 cd00009 (AAA)<br>1-319 PHA02544 (44)<br>16-261 COG2256 (RarA)<br>30-196 TIGR00678 (holB)<br>30-157 pfam13177 (DNA_pol3_delta2)<br>52-148 smart00382 (AAA) |

|    |       |       |                                                                     |                |     |    |          |                                                                                                                                                                                                                                                              |
|----|-------|-------|---------------------------------------------------------------------|----------------|-----|----|----------|--------------------------------------------------------------------------------------------------------------------------------------------------------------------------------------------------------------------------------------------------------------|
| 88 | 35908 | 36486 | Phage DNA polymerase clamp loader subunit Gp62                      | YP_009289501.1 | 96  | 66 | PKO111   | 3-192 PHA02593 (62)<br>41-178 pfam16790 (Phage_clamp_A)                                                                                                                                                                                                      |
| 89 | 36480 | 36857 | Phage endoribonulcease translational repressor of early genes, regA | YP_009146484.1 | 100 | 88 | Moon     | 1-125 PHA02543 (regA)<br>4-124 pfam01818 (Translat_reg)                                                                                                                                                                                                      |
| 90 | 36942 | 39647 | DNA polymerase (EC 2.7.7.7), phage-associated                       | YP_007235888.1 | 100 | 74 | phiR1-RT | 5-501 PHA02524 (43A)<br>519-899 PHA02523 (43B)<br>387-779 cd00145 (POLBc)<br>109-333 cd05160 (DEDDy_DNA_polB_exo)<br>1-900 PHA02528 (43)<br>111-624 smart00486 (POLBc)<br>388-857 pfam00136 (DNA_polB)<br>145-772 COG0417 (PolB)<br>389-650 TIGR00592 (pol2) |
| 91 | 39741 | 41405 | Phage protein                                                       | YP_002922391.1 | 99  | 81 | JS10     | 4-101 cd04181 (NTP_transferase)<br>351-412 cd05153 (HomoserineK_II)<br>3-77 COG1213 (COG1213)<br>3-94 pfam00483 (NTP_transferase)<br>369-419 COG4857 (COG4857)<br>4-70 TIGR03310 (matur_MocA_YgfJ)<br>364-414 smart00587 (CHK)                               |

|    |       |       |                                    |                           |     |    |       |                                                                                                                                                                       |
|----|-------|-------|------------------------------------|---------------------------|-----|----|-------|-----------------------------------------------------------------------------------------------------------------------------------------------------------------------|
|    |       |       |                                    |                           |     |    |       | 369-407 PRK09550 (mtnK)<br>1-108 COG1208 (GCD1)<br>3-115 TIGR03992 (Arch_glmU)<br>350-416 pfam01636 (APH)<br>3-95 PRK14357 (glmU)                                     |
| 92 | 41441 | 41569 | hypothetical protein               | no significant similarity |     |    |       |                                                                                                                                                                       |
| 93 | 41523 | 41882 | Phage protein                      | YP_009323940.1            | 100 | 87 | MX01  | 3-108 TIGR01689 (EcbF-BcbF)                                                                                                                                           |
| 94 | 41879 | 42418 | Phage protein                      | YP_001595169.1            | 98  | 78 | JS98  | 4-98 cd01672 (TMPK)<br>1-140 COG0125 (Tmk)<br>1-33 PRK00698 (tmk)                                                                                                     |
| 95 | 42415 | 43575 | Phage protein                      | YP_009190202.1            | 99  | 90 | PEi20 | 55-360 COG0826 (PrtC)<br>95-308 pfam01136 (Peptidase_U32)                                                                                                             |
| 96 | 43572 | 43817 | hypothetical protein               | YP_009190201.1            | 96  | 73 | PEi20 | 10-78 pfam01817 (CM_2)<br>10-78 smart00830 (CM_2)<br>5-78 COG1605 (PheA)<br>6-78 PRK07248 (PRK07248)<br>6-78 TIGR01791 (CM_archaeal)<br>1-77 PRK12595 (PRK12595)      |
| 97 | 43796 | 44509 | Thymidylate synthase (EC 2.1.1.45) | YP_001595168.1            | 97  | 87 | JS98  | 13-237 PRK00956 (thyA)<br>49-234 cd00351 (TS_Pyrimidine_Hmase)<br>10-233 TIGR03283 (thy_syn_methano)<br>121-234 COG0207 (ThyA)<br>123-234 pfam00303 (Thymidylat_synt) |

|     |       |       |                                                                        |                           |     |    |                |                                                                                                                                                                      |
|-----|-------|-------|------------------------------------------------------------------------|---------------------------|-----|----|----------------|----------------------------------------------------------------------------------------------------------------------------------------------------------------------|
| 98  | 44509 | 45408 | Phage protein                                                          | YP_009190199.1            | 100 | 70 | PEi20          |                                                                                                                                                                      |
| 99  | 45483 | 45752 | hypothetical protein                                                   | no significant similarity |     |    |                |                                                                                                                                                                      |
| 100 | 45836 | 47005 | Phage recombination protein                                            | YP_009211461.1            | 98  | 93 | PM2            | 39-292 cd00983 (recA)<br>39-250 pfam00154 (RecA)<br>39-302 TIGR02012 (tigrfam_recA)<br>39-260 PRK09519 (recA)<br>9-279 COG0468 (RecA)                                |
| 101 | 46995 | 47336 | Phage capsid vertex assembly chaperone                                 | YP_009190599.1            | 99  | 54 | JD18           | 49-101 pfam11113 (Phage_head_chap)                                                                                                                                   |
| 102 | 47346 | 48779 | DNA primase/helicase, phage-associated                                 | YP_009288713.1            | 100 | 80 | vB_KpnM_KpV477 | 179-382 cd00984 (DnaB_C)<br>179-360 pfam13481 (AAA_25)<br>1-477 PHA02542 (41)<br>36-382 COG0305 (DnaB)<br>5-385 TIGR03600 (phage_DnaB)<br>179-339 pfam03796 (DnaB_C) |
| 103 | 48840 | 49121 | hypothetical protein                                                   | YP_004009892.1            | 100 | 51 | CC31           |                                                                                                                                                                      |
| 104 | 49118 | 49396 | hypothetical protein                                                   | YP_009190191.1            | 100 | 43 | PEi20          |                                                                                                                                                                      |
| 105 | 49421 | 49588 | Phage protein                                                          | YP_009190593.1            | 72  | 73 | JD18           | 3-48 PHA02541 (23)<br>3-48 pfam07068 (Gp23)                                                                                                                          |
| 106 | 49612 | 50631 | DNA primase (EC 2.7.7.-) / DNA helicase (EC 3.6.1.-), phage-associated | YP_009288708.1            | 100 | 71 | vB_KpnM_KpV477 | 175-204 pfam08275 (Toprim_N)<br>3-339 PHA02540 (61)<br>175-247 TIGR01391 (dnaG)<br>175-311 COG0358 (DnaG)                                                            |

|     |       |       |                                                                                                        |                           |     |    |                |                                                                                                       |
|-----|-------|-------|--------------------------------------------------------------------------------------------------------|---------------------------|-----|----|----------------|-------------------------------------------------------------------------------------------------------|
| 107 | 50857 | 51138 | hypothetical protein                                                                                   | YP_009190186.1            | 98  | 68 | PEi20          | 2-51 cd11536 (NTP-PPase_iMazG)                                                                        |
| 108 | 51201 | 51953 | Phage protein                                                                                          | YP_007010327.1            | 49  | 39 | CC2            | 1-82 COG3755 (YecT)<br>26-95 pfam07007 (DUF1311)<br>1-104 COG4461 (Lprl)<br>5-127 PHA02067 (PHA02067) |
| 109 | 51997 | 52515 | dCTP<br>pyrophosphatase (EC<br>3.6.1.12),<br>phage-associated                                          | YP_009202758.1            | 100 | 87 | QL01           | 1-172 PHA02602 (56)<br>69-172 cd11527 (NTP-PPase_dUTPase)<br>129-172 pfam08761 (dUTPase_2)            |
| 110 | 52515 | 52730 | hypothetical protein                                                                                   | YP_009288700.1            | 57  | 85 | vB_KpnM_KpV477 |                                                                                                       |
| 111 | 52754 | 52990 | Phage capsid and<br>scaffold                                                                           | YP_009288699.1            | 100 | 83 | vB_KpnM_KpV477 | 2-57 pfam16855 (Soc)                                                                                  |
| 112 | 53070 | 53309 | hypothetical protein                                                                                   | YP_009190182.1            | 89  | 54 | PEi20          |                                                                                                       |
| 113 | 53306 | 53479 | hypothetical protein                                                                                   | no significant similarity |     |    |                |                                                                                                       |
| 114 | 53476 | 53871 | Phage protein                                                                                          | YP_009190181.1            | 82  | 38 | PEi20          |                                                                                                       |
| 115 | 54039 | 54542 | hypothetical protein                                                                                   | YP_009288697.1            | 100 | 35 | vB_KpnM_KpV477 |                                                                                                       |
| 116 | 54542 | 54718 | Molybdenum ABC<br>transporter,<br>periplasmic<br>molybdenum-bindin<br>g protein ModA (TC<br>3.A.1.8.1) | YP_001595147.1            | 98  | 67 | JS98           |                                                                                                       |
| 117 | 54786 | 55388 | NAD--protein                                                                                           | YP_009190178.1            | 98  | 72 | PEi20          |                                                                                                       |

|     |       |       |                                             |                |     |    |            |                                                                                                                                                                                                                                                       |
|-----|-------|-------|---------------------------------------------|----------------|-----|----|------------|-------------------------------------------------------------------------------------------------------------------------------------------------------------------------------------------------------------------------------------------------------|
|     |       |       | ADP-ribosyltransferase modA (EC 2.4.2.-)    |                |     |    |            |                                                                                                                                                                                                                                                       |
| 118 | 55457 | 55648 | hypothetical protein                        | YP_009210230.1 | 57  | 50 | slur02     | 5-48 pfam10493 (Rod_C)                                                                                                                                                                                                                                |
| 119 | 55707 | 56450 | Phage anti-termination                      | YP_004009877.1 | 97  | 44 | CC31       |                                                                                                                                                                                                                                                       |
| 120 | 56450 | 56755 | hypothetical protein                        | YP_007501056.1 | 99  | 42 | vB_SenMS16 |                                                                                                                                                                                                                                                       |
| 121 | 56752 | 58080 | DNA helicase (EC 3.6.1.-), phage-associated | YP_009005281.1 | 99  | 75 | PG7        | 6-196 pfam13604 (AAA_30)<br>9-143 cd00009 (AAA)<br>395-442 pfam13538 (UvrD_C_2)<br>34-57 PRK13768 (PRK13768)<br>11-195 TIGR01448 (recD_rel)<br>32-263 COG0507 (RecD)<br>34-156 PRK10875 (recD)<br>7-119 smart00487 (DEXDc)<br>7-68 pfam13086 (AAA_11) |
| 122 | 58088 | 58309 | hypothetical protein                        | YP_009190174.1 | 100 | 45 | PEi20      |                                                                                                                                                                                                                                                       |
| 123 | 58306 | 58989 | T4-like phage DexA exonuclease A            | YP_009211433.1 | 100 | 68 | PM2        | 1-227 PHA02570 (dexA)                                                                                                                                                                                                                                 |
| 124 | 58986 | 59159 | hypothetical protein                        | YP_009190856.1 | 94  | 74 | JD18       |                                                                                                                                                                                                                                                       |
| 125 | 59169 | 59549 | Transcriptional regulator                   | YP_009190171.1 | 97  | 41 | PEi20      |                                                                                                                                                                                                                                                       |
| 126 | 59610 | 59831 | cef modifier of suppressor tRNAs,           | NP_861698.1    | 91  | 78 | RB69       |                                                                                                                                                                                                                                                       |

|     |       |       |                                                     |                |     |    |        |                                                                                                                                                                                                                                                                                                                                                                 |
|-----|-------|-------|-----------------------------------------------------|----------------|-----|----|--------|-----------------------------------------------------------------------------------------------------------------------------------------------------------------------------------------------------------------------------------------------------------------------------------------------------------------------------------------------------------------|
|     |       |       | phage-associated                                    |                |     |    |        |                                                                                                                                                                                                                                                                                                                                                                 |
| 127 | 59833 | 60546 | hypothetical protein                                | YP_004009870.1 | 33  | 35 | CC31   | 147-183 pfam04108 (APG17)                                                                                                                                                                                                                                                                                                                                       |
| 128 | 60533 | 60709 | hypothetical protein                                | YP_004009868.1 | 100 | 72 | CC31   | 1-58 COG2331 (COG23319)<br>1-52 TIGR02605 (CxxC_CxxC_SSSS)<br>1-44 smart00834 (CxxC_CxxC_SSSS)<br>1-31 pfam09723 (Zn-ribbon_8)<br>3-27 TIGR03680 (eif2g_arch)                                                                                                                                                                                                   |
| 129 | 60867 | 62708 | Phage DNA topoisomerase large subunit (EC 5.99.1.3) | YP_009190163.1 | 99  | 85 | PEi20  | 417-523 cd01030 (TOPRIM_TopoIIA_like)<br>261-347 cd03481 (TopoIIA_Trans_ScTopoIIA)<br>193-368 pfam00204 (DNA_gyraseB)<br>51-165 cd00075 (HATPase_c)<br>47-149 pfam02518 (HATPase_c)<br>47-165 smart00387 (HATPase_c)<br>525-612 pfam16898 (TOPRIM_C)<br>3-611 PHA02569 (39)<br>47-611 smart00433 (TOP2c)<br>6-611 COG0187 (GyrB)<br>4-613 TIGR01058 (parE_Gpos) |
| 130 | 62738 | 63061 | hypothetical protein                                | YP_009202734.1 | 97  | 56 | QL01   |                                                                                                                                                                                                                                                                                                                                                                 |
| 131 | 63048 | 63251 | Phage rIIA lysis inhibitor                          | YP_009146435.1 | 98  | 67 | Moon   |                                                                                                                                                                                                                                                                                                                                                                 |
| 132 | 63260 | 65407 | Phage rIIA lysis inhibitor                          | YP_009289531.1 | 99  | 46 | PKO111 | 39-136 smart00387 (HATPase_c)<br>38-136 pfam02518 (HATPase_c)                                                                                                                                                                                                                                                                                                   |

|     |       |       |                                                     |                           |     |    |                |                                                                                                                                                                    |
|-----|-------|-------|-----------------------------------------------------|---------------------------|-----|----|----------------|--------------------------------------------------------------------------------------------------------------------------------------------------------------------|
|     |       |       |                                                     |                           |     |    |                | 41-136 cd00075 (HATPase_c)<br>37-145 TIGR01052 (top6b)                                                                                                             |
| 133 | 65420 | 66325 | Phage rIIB lysis inhibitor                          | YP_009289532.1            | 99  | 82 | PKO111         |                                                                                                                                                                    |
| 134 | 66366 | 66557 | Phage protein                                       | YP_009190458.1            | 100 | 78 | PEi20          |                                                                                                                                                                    |
| 135 | 66557 | 66841 | Phage protein                                       | YP_007004180.1            | 87  | 78 | Bp7            |                                                                                                                                                                    |
| 136 | 66906 | 67391 | Phage endonuclease                                  | YP_003934906.1            | 97  | 51 | SP18           | 48-114 PHA02151 (PHA02151)                                                                                                                                         |
| 137 | 67439 | 67678 | hypothetical protein                                | no significant similarity |     |    |                |                                                                                                                                                                    |
| 138 | 67726 | 67845 | hypothetical protein                                | YP_009190454.1            | 89  | 54 | PEi20          |                                                                                                                                                                    |
| 139 | 68021 | 68479 | Phage protein                                       | YP_009005552.1            | 96  | 67 | PG7            | 8-152 pfam06591 (Phage_T4_Ndd)                                                                                                                                     |
| 140 | 68715 | 68828 | hypothetical protein                                | YP_009205956.1            | 97  | 44 | vB_EcoM_VR5    |                                                                                                                                                                    |
| 141 | 68821 | 68961 | hypothetical protein                                | YP_009288944.1            | 100 | 63 | vB_KpnM_KpV477 | 1-46 TIGR01597 (PYST-B)                                                                                                                                            |
| 142 | 68967 | 70331 | DNA topoisomerase, phage-associated                 | YP_009190447.1            | 96  | 75 | PEi20          | 40-450 cd00187 (TOP4c)<br>15-454 PHA02592 (52)<br>19-454 smart00434 (TOP4c)<br>40-454 pfam00521 (DNA_topoisoIV)<br>8-454 COG0188 (GyrA)<br>20-426 TIGR01063 (gyrA) |
| 143 | 70328 | 70507 | hypothetical protein                                | no significant similarity |     |    |                |                                                                                                                                                                    |
| 144 | 70757 | 71404 | hypothetical protein                                | YP_009190445.1            | 100 | 64 | PEi20          | 70-117 cd04268 (ZnMc_MMP_like)                                                                                                                                     |
| 145 | 71479 | 72111 | Phage transcriptional regulator of middle promoters | YP_009190443.1            | 100 | 73 | PEi20          | 2-97 pfam09114 (MotA_activ)<br>111-206 pfam09158 (MotCF)                                                                                                           |



|     |       |       |                                        |                           |     |    |                  |                                                            |
|-----|-------|-------|----------------------------------------|---------------------------|-----|----|------------------|------------------------------------------------------------|
| 146 | 72119 | 72304 | hypothetical protein                   | YP_009190442.1            | 98  | 50 | PEi20            |                                                            |
| 147 | 72306 | 72629 | Phage anti-restriction nuclease        | YP_002854592.1            | 100 | 66 | RB14             |                                                            |
| 148 | 72626 | 72805 | hypothetical protein                   | YP_009056803.1            | 84  | 60 | vB_EcoM_PhAPE C2 |                                                            |
| 149 | 72996 | 73457 | Phage anti-restriction nuclease        | YP_009207447.1            | 99  | 86 | vB_EcoM_VR20     |                                                            |
| 150 | 73457 | 73573 | hypothetical protein                   | YP_009288935.1            | 97  | 89 | vB_KpnM_KpV477   |                                                            |
| 151 | 73566 | 73826 | hypothetical protein                   | YP_009146715.1            | 100 | 47 | Moon             | 30-74 cd03015 (PRX_Typ2cys)<br>44-85 TIGR04141 (TIGR04141) |
| 152 | 73826 | 74131 | hypothetical protein                   | no significant similarity |     |    |                  |                                                            |
| 153 | 74185 | 74457 | Phage anti-sigma factor                | YP_004010118.1            | 97  | 65 | CC31             | 2-81 pfam09010 (AsiA)                                      |
| 154 | 75114 | 74458 | Phage holin                            | YP_009190823.1            | 100 | 69 | JD18             | 4-217 pfam11031 (Phage_holin_T)                            |
| 155 | 75535 | 75134 | hypothetical protein                   | YP_009190822.1            | 100 | 51 | JD18             |                                                            |
| 156 | 79780 | 75569 | Phage tail fiber protein               | YP_003580110.1            | 88  | 63 | KP15             | 1095-1286 PHA02584 (34)                                    |
| 157 | 80467 | 79790 | Phage tail connector protein           | YP_009289546.1            | 100 | 86 | PKO111           | 1-225 pfam03903 (Phage_T4_gp36)                            |
| 158 | 81645 | 80524 | Phage tail connector protein           | YP_009288926.1            | 99  | 51 | vB_KpnM_KpV477   |                                                            |
| 159 | 85490 | 81657 | Phage long tail fiber proximal subunit | YP_009289548.1            | 100 | 50 | PKO111           | 1-1275 PHA02584 (34)                                       |

|     |       |       |                                                                                                     |                |     |    |                |                                                                                                                                                                                                                                           |
|-----|-------|-------|-----------------------------------------------------------------------------------------------------|----------------|-----|----|----------------|-------------------------------------------------------------------------------------------------------------------------------------------------------------------------------------------------------------------------------------------|
| 160 | 85576 | 86517 | Phage ribonuclease H (EC 3.1.26.4)                                                                  | YP_009205940.1 | 99  | 76 | vB_EcoM_VR5    | 15-188 cd09860 (PIN_T4-like)<br>187-312 pfam09293 (RNaseH_C)<br>188-266 cd09899 (H3TH_T4-like)<br>1-312 PHA02567 (rnh)<br>51-210 smart00475 (53EXOc)<br>51-181 pfam02739 (5_3_exonuc_N)<br>57-210 TIGR00593 (pola)<br>6-210 COG0258 (Exo) |
| 161 | 86528 | 86797 | Phage double-stranded DNA binding protein #T4-like dsbA, late transcriptional regulation #T4 GC1668 | YP_009190426.1 | 100 | 64 | PEi20          | 1-88 PHA02599 (dsbA)<br>24-89 pfam11126 (Phage_DsbA)<br>17-85 cd08645 (FMT_core_GART)                                                                                                                                                     |
| 162 | 86778 | 87071 | Transcriptional regulator                                                                           | YP_009288922.1 | 91  | 66 | vB_KpnM_KpV477 | 22-93 pfam16805 (Trans_coact)                                                                                                                                                                                                             |
| 163 | 87068 | 87724 | Phage DNA helicase loader                                                                           | YP_009190814.1 | 99  | 87 | JD18           | 14-106 pfam08993 (T4_Gp59_N)<br>113-216 pfam08994 (T4_Gp59_C)<br>1-217 PHA02559 (59)                                                                                                                                                      |
| 164 | 87801 | 88697 | Single stranded DNA-binding protein,                                                                | YP_004010107.1 | 100 | 67 | CC31           | 1-279 PHA02550 (32)<br>28-116 pfam08804 (gp32)<br>149-208 PRK06599 (PRK06599)                                                                                                                                                             |

|     |       |       |                                                 |                |     |    |        |                                                                                                                                                                                      |
|-----|-------|-------|-------------------------------------------------|----------------|-----|----|--------|--------------------------------------------------------------------------------------------------------------------------------------------------------------------------------------|
|     |       |       | phage-associated                                |                |     |    |        |                                                                                                                                                                                      |
| 165 | 88800 | 89021 | hypothetical protein                            | YP_009146696.1 | 94  | 41 | Moon   |                                                                                                                                                                                      |
| 166 | 89022 | 89402 | Phage protein                                   | YP_009190420.1 | 95  | 46 | PEi20  | 30-126 pfam03197 (FRD2)                                                                                                                                                              |
| 167 | 89458 | 89736 | Phage protein                                   | YP_009146693.1 | 85  | 81 | Moon   |                                                                                                                                                                                      |
| 168 | 89815 | 90135 | hypothetical protein                            | YP_009289557.1 | 100 | 96 | PKO111 |                                                                                                                                                                                      |
| 169 | 90218 | 90823 | Dihydrofolate<br>reductase,<br>phage-associated | YP_009190412.1 | 97  | 62 | PEi20  | 22-151 cd00209 (DHFR)<br>23-151 pfam00186 (DHFR_1)<br>1-142 COG0262 (FolA)<br>23-151 PRK10769 (folA)<br>23-186 PTZ00164 (PTZ00164)                                                   |
| 170 | 90816 | 91139 | hypothetical protein                            | YP_009146687.1 | 99  | 41 | Moon   |                                                                                                                                                                                      |
| 171 | 91120 | 91473 | hypothetical protein                            | YP_009005517.1 | 95  | 54 | PG7    |                                                                                                                                                                                      |
| 172 | 91556 | 91684 | hypothetical protein                            | YP_009111049.1 | 100 | 71 | pSs-1  |                                                                                                                                                                                      |
| 173 | 91684 | 92544 | Thymidylate<br>synthase (EC 2.1.1.45)           | YP_009324126.1 | 100 | 83 | MX01   | 2-286 pfam00303 (Thymidylat_synt)<br>1-286 PRK01827 (thyA)<br>3-286 TIGR03284 (thym_sym)<br>1-286 COG0207 (ThyA)<br>3-227 cd00351 (TS_Pyrimidine_HMase)<br>3-286 PTZ00164 (PTZ00164) |
| 174 | 92541 | 92765 | hypothetical protein                            | YP_009190408.1 | 100 | 77 | PEi20  |                                                                                                                                                                                      |
| 175 | 92816 | 92968 | hypothetical protein                            | YP_009190803.1 | 100 | 74 | JD18   |                                                                                                                                                                                      |
| 176 | 93031 | 93264 | Phage protein                                   | YP_004010093.1 | 100 | 79 | CC31   | 2-62 pfam14216 (DUF4326)                                                                                                                                                             |
| 177 | 93261 | 95516 | Ribonucleotide                                  | YP_009190406.1 | 100 | 82 | PEi20  | 164-727 cd01679 (RNR_1)                                                                                                                                                              |

|     |       |       |                                                                                     |                           |     |    |                |                                                                                                                                                                                            |
|-----|-------|-------|-------------------------------------------------------------------------------------|---------------------------|-----|----|----------------|--------------------------------------------------------------------------------------------------------------------------------------------------------------------------------------------|
|     |       |       | reductase of class Ia<br>(aerobic), alpha<br>subunit (EC 1.17.4.1)                  |                           |     |    |                | 136-214 pfam00317 (Ribonuc_red_lgN)<br>1-87 pfam03477 (ATP-cone)<br>1-751 PHA02572 (ntdA)<br>140-728 TIGR02506 (NrdA_NrdA)<br>57-750 COG0209 (NrdA)<br>217-724 pfam02867 (Ribonuc_red_lgC) |
| 178 | 95555 | 95938 | hypothetical protein                                                                | no significant similarity |     |    |                |                                                                                                                                                                                            |
| 179 | 95989 | 97131 | Ribonucleotide<br>reductase of class Ia<br>(aerobic), beta<br>subunit (EC 1.17.4.1) | YP_009190800.1            | 100 | 84 | JD18           | 3-371 PRK09101 (nrdB)<br>1-371 COG0208 (NrdF)<br>28-343 cd01049 (RNRR2)<br>32-323 pfam00268 (Ribonuc_red_sm)<br>41-157 TIGR04171 (RNR_1b_NrdF)<br>38-343 PRK12759 (PRK12759)               |
| 180 | 97159 | 97575 | Phage endonuclease                                                                  | YP_009289564.1            | 100 | 83 | PKO111         | 4-137 PHA02598 (denA)<br>35-133 cd10436<br>(GIY-YIG_EndoII_Hpy188I_like)<br>33-134 smart00465 (GIYc)<br>34-62 pfam01541 (GIY-YIG)<br>42-131 PRK12306 (uvrC)                                |
| 181 | 97572 | 98729 | RNA ligase,<br>phage-associated                                                     | YP_009288910.1            | 100 | 56 | vB_KpnM_KpV477 | 1-376 PHA02589 (rnlA)<br>3-376 TIGR02308 (RNA_lig_T4_1)<br>53-248 pfam09511 (RNA_lig_T4_1)<br>54-123 COG5324 (Trl1)                                                                        |

|     |        |        |                                                            |                           |     |    |               |                                                                                                                                                                                                                                                                                                                                 |
|-----|--------|--------|------------------------------------------------------------|---------------------------|-----|----|---------------|---------------------------------------------------------------------------------------------------------------------------------------------------------------------------------------------------------------------------------------------------------------------------------------------------------------------------------|
| 182 | 98788  | 99297  | Phage alc transcription terminator                         | YP_009190400.1            | 98  | 63 | PEi20         |                                                                                                                                                                                                                                                                                                                                 |
| 183 | 99387  | 99635  | hypothetical protein                                       | YP_009146676.1            | 93  | 32 | Moon          |                                                                                                                                                                                                                                                                                                                                 |
| 184 | 99701  | 99925  | Phage outer membrane lipoprotein Rz1                       | YP_007236059.1            | 94  | 60 | phiR1-RT      |                                                                                                                                                                                                                                                                                                                                 |
| 185 | 99970  | 100455 | hypothetical protein                                       | YP_009190397.1            | 99  | 53 | PEi20         |                                                                                                                                                                                                                                                                                                                                 |
| 186 | 100455 | 100664 | hypothetical protein                                       | YP_006906137.1            | 100 | 48 | NJ01          |                                                                                                                                                                                                                                                                                                                                 |
| 187 | 100661 | 100837 | hypothetical protein                                       | no significant similarity |     |    |               |                                                                                                                                                                                                                                                                                                                                 |
| 188 | 100834 | 101736 | 3'-phosphatase, 5'-polynucleotide kinase, phage-associated | YP_009148660.1            | 100 | 76 | HY01          | 1-139 COG4639 (COG4639)<br>4-149 TIGR03574 (selen_PSTK)<br>161-213 cd01427 (HAD_like)<br>1-25 PRK08118 (PRK08118)<br>4-59 pfam13207 (AAA_17)<br>156-234 pfam03767 (Acid_phosphat_B)<br>162-231 smart00775 (LNS2)<br>1-300 PHA02530 (pseT)<br>4-139 pfam13671 (AAA_33)<br>4-139 TIGR04075 (bacter_Pnkp)<br>1-149 COG4088 (Kti12) |
| 189 | 101766 | 102029 | hypothetical protein                                       | no significant similarity |     |    |               |                                                                                                                                                                                                                                                                                                                                 |
| 190 | 102088 | 102303 | Phage protein                                              | YP_009286570.1            | 100 | 76 | vB_SnwM_CGG4- |                                                                                                                                                                                                                                                                                                                                 |

|     |        |        |                                                                                              |                           |     |    |                     |                                                                                                                                                                                                                        |
|-----|--------|--------|----------------------------------------------------------------------------------------------|---------------------------|-----|----|---------------------|------------------------------------------------------------------------------------------------------------------------------------------------------------------------------------------------------------------------|
|     |        |        |                                                                                              |                           |     |    | 1                   |                                                                                                                                                                                                                        |
| 191 | 102313 | 102591 | hypothetical protein                                                                         | YP_009190791.1            | 98  | 44 | JD18                |                                                                                                                                                                                                                        |
| 192 | 102581 | 102811 | hypothetical protein                                                                         | YP_009190392.1            | 97  | 54 | PEi20               |                                                                                                                                                                                                                        |
| 193 | 102855 | 103847 | 2-keto-3-deoxy-D-ara<br>bino-heptulosonate-7<br>-phosphate synthase<br>I alpha (EC 2.5.1.54) | YP_009056797.1            | 99  | 68 | vB_EcoM_PhAPE<br>C2 | 5-329 PRK09261 (PRK09261)<br>5-326 COG0722 (AroG1)<br>5-328 TIGR00034 (aroFGH)<br>37-324 pfam00793 (DAHP_synth_1)                                                                                                      |
| 194 | 103850 | 104410 | dCMP deaminase<br>(EC 3.5.4.12); Late<br>competence protein<br>ComEB                         | YP_009190390.1            | 100 | 87 | PEi20               | 1-182 PHA02588 (cd)<br>3-157 cd01286 (deoxycytidylate_deaminase)<br>1-164 COG2131 (ComEB)<br>10-178 TIGR02571 (ComEB)<br>2-143 pfam00383 (dCMP_cyt_deam_1)<br>54-164 TIGR00326 (eubact_ribD)<br>54-143 PRK10786 (ribD) |
| 195 | 104410 | 104745 | hypothetical protein                                                                         | no significant similarity |     |    |                     |                                                                                                                                                                                                                        |
| 196 | 104742 | 105065 | Phage tail fibers                                                                            | YP_009190388.1            | 99  | 82 | PEi20               | 22-105 pfam10902 (DUF2693)                                                                                                                                                                                             |
| 197 | 105130 | 105459 | Phage head assembly<br>chaperone protein                                                     | YP_009146662.1            | 100 | 69 | Moon                | 5-108 pfam00166 (Cpn10)<br>5-65 cd00320 (cpn10)                                                                                                                                                                        |
| 198 | 105565 | 105813 | Phage rIII lysis<br>inhibitor accessory                                                      | YP_004009824.1            | 100 | 74 | Acj61               |                                                                                                                                                                                                                        |
| 199 | 106182 | 106358 | Phage protein                                                                                | YP_009288895.1            | 100 | 98 | vB_KpnM_KpV477      |                                                                                                                                                                                                                        |
| 200 | 106465 | 106833 | Phage protein                                                                                | YP_009146659.1            | 97  | 78 | Moon                | 3-121 pfam06019 (Phage_30_8)                                                                                                                                                                                           |
| 201 | 106873 | 107403 | hypothetical protein                                                                         | YP_004010067.1            | 56  | 32 | CC31                |                                                                                                                                                                                                                        |

|     |        |        |                                                  |                           |     |    |                |                                                                                                                                                                     |
|-----|--------|--------|--------------------------------------------------|---------------------------|-----|----|----------------|---------------------------------------------------------------------------------------------------------------------------------------------------------------------|
| 202 | 107413 | 107889 | hypothetical protein                             | no significant similarity |     |    |                |                                                                                                                                                                     |
| 203 | 107952 | 108308 | Phage protein                                    | YP_004010066.1            | 100 | 77 | CC31           | 1-118 pfam06919 (Phage_T4_Gp30_7)                                                                                                                                   |
| 204 | 108347 | 108826 | hypothetical protein                             | no significant similarity |     |    |                |                                                                                                                                                                     |
| 205 | 108823 | 109104 | hypothetical protein                             | YP_009288892.1            | 100 | 57 | vB_KpnM_KpV477 |                                                                                                                                                                     |
| 206 | 109115 | 109279 | hypothetical protein                             | YP_009190379.1            | 100 | 59 | PEi20          | 6-42 PRK15101 (PRK15101)                                                                                                                                            |
| 207 | 109276 | 109458 | hypothetical protein                             | no significant similarity |     |    |                |                                                                                                                                                                     |
| 208 | 109448 | 109660 | hypothetical protein                             | YP_009190776.1            | 92  | 52 | JD18           |                                                                                                                                                                     |
| 209 | 109638 | 110480 | Phage protein                                    | YP_009288888.1            | 96  | 48 | vB_KpnM_KpV477 | 1-196 PHA02597 (30,2)<br>1-116 COG1011 (YigB)                                                                                                                       |
| 210 | 110488 | 110763 | Phage protein                                    | NP_861903.1               | 100 | 64 | RB69           | 1-82 pfam11243 (DUF3045)                                                                                                                                            |
| 211 | 110760 | 112238 | DNA ligase,<br>phage-associated                  | YP_007004245.1            | 99  | 67 | Bp7            | 135-361 pfam01068 (DNA_ligase_A_M)<br>134-361 cd06846<br>(Adenylation_DNA_ligase_like)<br>1-490 PHA02587 (39)<br>159-489 COG1793 (CDC9)<br>136-486 TIGR00574 (dnl1) |
| 212 | 112301 | 114394 | RNA<br>polymerase-ADP-rib<br>osyltransferase Alt | YP_009190371.1            | 100 | 60 | PEi20          | 387-624 cd00233 (VIP2)<br>416-626 pfam03496 (ADPrib_exo_Tox)<br>458-635 PHA02057 (PHA02057)<br>1-696 PHA02566 (alt)                                                 |
| 213 | 114455 | 114742 | Phage protein                                    | YP_009180694.1            | 100 | 49 | slur14         |                                                                                                                                                                     |
| 214 | 115690 | 114773 | Phage baseplate tail<br>tube initiator           | YP_009289587.1            | 100 | 72 | PKO111         | 1-305 PHA02605 (54)<br>144-246 pfam06841 (Phage_T4_gp19)                                                                                                            |

|     |        |        |                                                       |                |     |    |                |                                                                                                             |
|-----|--------|--------|-------------------------------------------------------|----------------|-----|----|----------------|-------------------------------------------------------------------------------------------------------------|
| 215 | 116745 | 115690 | Phage baseplate tail tube cap (T4-like gp48)          | YP_009190767.1 | 99  | 77 | JD18           | 1-349 PHA02613 (48)<br>13-343 pfam11091 (T4_tail_cap)                                                       |
| 216 | 118455 | 116755 | Phage baseplate hub                                   | YP_009289589.1 | 97  | 43 | PKO111         | 357-516 PTZ00121 (PTZ00121)                                                                                 |
| 217 | 118982 | 118455 | Phage baseplate hub                                   | YP_009190765.1 | 100 | 65 | JD18           | 21-174 pfam11110 (Phage_hub_GP28)                                                                           |
| 218 | 120096 | 118954 | Phage baseplate hub subunit                           | YP_009289591.1 | 100 | 72 | PKO111         | 4-198 pfam09097 (Phage-tail_1)<br>201-373 pfam09096 (Phage-tail_2)<br>4-371 PHA02612 (27)                   |
| 219 | 120851 | 120093 | Phage baseplate                                       | YP_009190763.1 | 98  | 63 | JD18           | 78-202 pfam12322 (T4_baseplate)<br>1-251 PHA02611 (51)                                                      |
| 220 | 120902 | 121528 | Phage baseplate hub assembly chaperone (T4-like gp26) | YP_009288876.1 | 99  | 64 | vB_KpnM_KpV477 | 84-205 pfam12322 (T4_baseplate)<br>20-207 PHA02611 (51)                                                     |
| 221 | 121525 | 121914 | Phage baseplate wedge subunit (T4-like gp25)          | YP_009190761.1 | 98  | 72 | JD18           | 1-129 PHA00415 (25)<br>27-116 pfam04965 (GPW_gp25)<br>31-99 COG3628 (COG3628)<br>29-96 TIGR03357 (VI_zyyme) |
| 222 | 121962 | 122381 | Single stranded DNA-binding protein, phage-associated | YP_009190760.1 | 98  | 79 | JD18           | 9-138 pfam11056 (UvsY)                                                                                      |
| 223 | 122412 | 122576 | Phage protein                                         | YP_009288873.1 | 94  | 75 | vB_KpnM_KpV477 | 4-54 PHA02610 (uvsY.-2)<br>4-53 pfam10886 (DUF2685)                                                         |



|     |        |        |                                           |                           |     |    |                |                                                                                                                                                                                                                                     |
|-----|--------|--------|-------------------------------------------|---------------------------|-----|----|----------------|-------------------------------------------------------------------------------------------------------------------------------------------------------------------------------------------------------------------------------------|
| 224 | 122865 | 122638 | DNA helicase,<br>phage-associated         | YP_009005466.1            | 97  | 70 | PG7            | 3-75 PHA02609 (uvsW.1)<br>19-63 pfam11637 (UvsW)                                                                                                                                                                                    |
| 225 | 124374 | 122875 | DNA helicase,<br>phage-associated         | YP_009289598.1            | 99  | 79 | PKO111         | 111-256 pfam04851 (ResIII)<br>318-448 cd00079 (HELICc)<br>357-440 smart00490 (HELICc)<br>129-258 cd00046 (DEXDc)<br>341-438 pfam00271 (Helicase_C)<br>1-499 PHA02558 (uvsW)<br>117-453 COG1061 (SSL2)<br>112-284 smart00487 (DEXDc) |
| 226 | 124432 | 125151 | Inh inhibitor of gp21<br>prohead protease | YP_009324076.1            | 100 | 59 | MX01           |                                                                                                                                                                                                                                     |
| 227 | 125161 | 125892 | Phage capsid and<br>scaffold              | YP_009288869.1            | 95  | 91 | vB_KpnM_KpV477 |                                                                                                                                                                                                                                     |
| 228 | 126096 | 126296 | Phage capsid and<br>scaffold              | YP_003734323.1            | 100 | 82 | IME08          |                                                                                                                                                                                                                                     |
| 229 | 126397 | 126615 | Phage protein                             | YP_009190355.1            | 100 | 88 | PEi20          | 1-57 pfam11242 (DUF2774)                                                                                                                                                                                                            |
| 230 | 126608 | 126970 | hypothetical protein                      | YP_009190354.1            | 100 | 74 | PEi20          |                                                                                                                                                                                                                                     |
| 231 | 127118 | 126960 | hypothetical protein                      | no significant similarity |     |    |                |                                                                                                                                                                                                                                     |
| 232 | 127086 | 128084 | RNA ligase,<br>phage-associated           | YP_009190353.1            | 100 | 77 | PEi20          | 2-331 TIGR02307 (RNA_lig_RNL2)<br>31-224 pfam09414 (RNA_ligase)<br>35-163 cd07894 (Adenylation_RNA_ligase)<br>90-231 TIGR02306 (RNA_lig_DRB0094)                                                                                    |

|     |        |        |                                              |                |     |    |                |                                                               |
|-----|--------|--------|----------------------------------------------|----------------|-----|----|----------------|---------------------------------------------------------------|
| 233 | 128453 | 128629 | hypothetical protein                         | YP_009289603.1 | 100 | 63 | PKO111         |                                                               |
| 234 | 129919 | 128651 | Phage capsid vertex                          | YP_009207368.1 | 99  | 80 | vB_EcoM_VR20   | 2-422 PHA02548 (24)<br>114-383 pfam07068 (Gp23)               |
| 235 | 131190 | 129916 | Phage capsid vertex                          | YP_009202910.1 | 99  | 74 | QL01           | 1-422 PHA02548 (24)<br>29-382 pfam07068 (Gp23)                |
| 236 | 132848 | 131283 | Phage major capsid protein                   | YP_009005455.1 | 99  | 86 | PG7            | 1-521 PHA02541 (23)<br>6-501 pfam07068 (Gp23)                 |
| 237 | 133687 | 132869 | Phage prohead assembly (scaffolding) protein | YP_009288861.1 | 100 | 72 | vB_KpnM_KpV477 | 1-272 PHA02557 (22)                                           |
| 238 | 134381 | 133716 | Phage prohead assembly (scaffolding) protein | YP_009190746.1 | 98  | 79 | JD18           | 7-220 PHA00911 (21)<br>8-195 pfam03420 (Peptidase_S77)        |
| 239 | 134806 | 134381 | Phage capsid and scaffold                    | YP_009190745.1 | 100 | 77 | JD18           | 1-140 PHA02586 (68)                                           |
| 240 | 135048 | 134806 | Phage prohead core protein                   | YP_009209927.1 | 70  | 63 | vB_EcoM_VR25   | 1-45 PHA02608 (65)                                            |
| 241 | 136617 | 135049 | Phage portal vertex of the head              | YP_009190743.1 | 100 | 81 | JD18           | 2-517 PHA02531 (20)<br>6-507 pfam07230 (Peptidase_S80)        |
| 242 | 137208 | 136717 | Phage tail fibers                            | YP_009288856.1 | 99  | 87 | vB_KpnM_KpV477 | 1-162 PHA02551 (19)<br>17-162 pfam06841 (Phage_T4_gp19)       |
| 243 | 139371 | 137389 | Phage tail sheath monomer                    | YP_009289428.1 | 99  | 81 | PKO111         | 2-646 pfam04984 (Phage_sheath_1)<br>405-646 COG3497 (COG3497) |

|     |        |        |                                                                                    |                |     |    |                |                                                                                                            |
|-----|--------|--------|------------------------------------------------------------------------------------|----------------|-----|----|----------------|------------------------------------------------------------------------------------------------------------|
|     |        |        |                                                                                    |                |     |    |                | 1-657 PHA02539 (18)                                                                                        |
| 244 | 141240 | 139405 | Phage terminase,<br>large subunit                                                  | YP_009190343.1 | 100 | 92 | PEi20          | 142-288 pfam05876 (Terminase_GpA)<br>80-609 PHA02533 (17)<br>158-573 pfam03237 (Terminase_6)               |
| 245 | 141707 | 141240 | Phage terminase,<br>small subunit                                                  | YP_009203902.1 | 100 | 86 | Merlin         | 1-151 PHA02585 (16)<br>3-144 pfam11053 (DNA_Packaging)                                                     |
| 246 | 142497 | 141718 | Proximal tail sheath<br>stabilization protein                                      | YP_009190738.1 | 98  | 73 | JD18           | 1-259 PHA02556 (15)<br>1-233 pfam16724 (T4-gp15_tss)                                                       |
| 247 | 143151 | 142558 | Phage-associated<br>homing<br>endonuclease                                         | YP_009288851.1 | 97  | 84 | vB_KpnM_KpV477 | 111-193 cd00283 (GIY-YIG_Cterm)                                                                            |
| 248 | 143940 | 143161 | T4-like phage head<br>completion, neck<br>hetero-dimeric<br>protein (T4-like gp14) | YP_009190340.1 | 99  | 77 | PEi20          | 25-235 PHA02555 (14)<br>21-254 pfam11649 (T4_neck-protein)                                                 |
| 249 | 144888 | 143944 | T4-like phage head<br>completion, neck<br>hetero-dimeric<br>protein (T4-like gp13) | YP_009190736.1 | 97  | 79 | JD18           | 6-314 PHA02554 (13)                                                                                        |
| 250 | 146716 | 144950 | Phage neck whiskers                                                                | YP_009289422.1 | 99  | 40 | PKO111         | 383-448 pfam07921 (Fibritin_C)<br>60-145 smart00150 (SPEC)<br>3-451 PHA02607 (wac)<br>43-285 COG1196 (Smc) |

|     |        |        |                                                                           |                |     |    |                |                                                     |
|-----|--------|--------|---------------------------------------------------------------------------|----------------|-----|----|----------------|-----------------------------------------------------|
| 251 | 148081 | 146726 | Phage straight tail fiber (short tail fiber)                              | YP_009190734.1 | 100 | 56 | JD18           | 52-264 PHA02584 (34)                                |
| 252 | 148734 | 148081 | Phage baseplate wedge subunit and tail pin (T4-like gp11)<br># T4 GC 1597 | YP_009289420.1 | 99  | 47 | PKO111         | 4-217 PHA02583 (11)<br>4-217 pfam08677 (GP11)       |
| 253 | 150545 | 148734 | Phage baseplate wedge subunit and tail pin (T4-like gp10)                 | YP_009288845.1 | 99  | 64 | vB_KpnM_KpV477 | 1-603 PHA02582 (10)<br>2-263 pfam07880 (T4_gp9_10)  |
| 254 | 151432 | 150548 | Phage baseplate wedge tail fiber connector (T4-like gp9)                  | YP_009190731.1 | 98  | 44 | JD18           | 5-291 PHA02581 (9)<br>8-280 pfam07880 (T4_gp9_10)   |
| 255 | 152528 | 151497 | Phage baseplate wedge subunit (T4-like gp8)                               | YP_009289417.1 | 100 | 72 | PKO111         | 10-343 PHA02580 (8)<br>16-343 pfam09215 (Phage-Gp8) |
| 256 | 155636 | 152529 | Phage baseplate wedge initiator (T4-like gp7)                             | YP_009289416.1 | 100 | 69 | PKO111         | 1-1035 PHA02579 (7)<br>7-101 cd00063 (FN3)          |
| 257 | 157582 | 155633 | Phage baseplate wedge subunit (T4-like gp6)                               | YP_009289415.1 | 100 | 73 | PKO111         | 16-649 PHA02553 (6)                                 |
| 258 | 157875 | 157582 | Phospholipase                                                             | YP_009288839.1 | 100 | 81 | vB_KpnM_KpV477 | 3-96 cd14737 (PAAR_1)                               |

|     |        |        |                                                          |                |     |    |                |                                                                                                                                                                            |
|-----|--------|--------|----------------------------------------------------------|----------------|-----|----|----------------|----------------------------------------------------------------------------------------------------------------------------------------------------------------------------|
|     |        |        |                                                          |                |     |    |                | 12-88 pfam05488 (PAAR_motif)<br>22-96 COG4104 (PAAR)                                                                                                                       |
| 259 | 158369 | 157875 | Phage protein                                            | YP_009288838.1 | 100 | 65 | vB_KpnM_KpV477 | 1-163 PHA02606 (5.1)                                                                                                                                                       |
| 260 | 160111 | 158372 | T4-like phage<br>baseplate hub + tail<br>lysozyme        | YP_009288837.1 | 100 | 76 | vB_KpnM_KpV477 | 175-340 cd00735<br>(bacteriophage_T4-like_lysozyme)<br>33-173 pfam06714 (Gp5_OB)<br>197-326 pfam00959 (Phage_lysozyme)<br>481-544 pfam03961 (DUF342)<br>4-579 PHA02596 (5) |
| 261 | 160695 | 160108 | Phage baseplate<br>wedge                                 | YP_009289411.1 | 100 | 71 | PKO111         | 1-192 PHA02578 (53)<br>1-188 pfam11246 (Phage_gp53)                                                                                                                        |
| 262 | 160747 | 161196 | Phage head<br>completion protein                         | YP_009289410.1 | 100 | 83 | PKO111         | 1-149 PHA02552 (4)<br>55-139 pfam08722 (Tn7_Tnp_TnsA_N)                                                                                                                    |
| 263 | 161196 | 162026 | Phage DNA end<br>protector during<br>packaging           | YP_004010009.1 | 100 | 77 | CC31           | 116-276 PHA02577 (2)                                                                                                                                                       |
| 264 | 162026 | 162634 | Phage tail completion<br>protein                         | YP_009289408.1 | 97  | 69 | PKO111         | 7-182 PHA02576 (3)                                                                                                                                                         |
| 265 | 162631 | 163335 | Deoxynucleotide<br>monophosphate<br>kinase (EC 2.7.4.13) | YP_009148127.1 | 100 | 60 | STML-198       | 6-234 PHA02575 (1)<br>212-234 COG0237 (CoA_E)                                                                                                                              |
| 266 | 163332 | 163565 | hypothetical protein                                     | YP_009190719.1 | 67  | 42 | JD18           |                                                                                                                                                                            |
| 267 | 163566 | 164021 | T4-like phage                                            | YP_009288829.1 | 100 | 82 | vB_KpnM_KpV477 | 1-148 PHA02574 (57B)                                                                                                                                                       |

|     |        |        |                                  |                           |     |    |                |                                                                                                      |
|-----|--------|--------|----------------------------------|---------------------------|-----|----|----------------|------------------------------------------------------------------------------------------------------|
|     |        |        | protein, T4 GC1584               |                           |     |    |                |                                                                                                      |
| 268 | 164115 | 164339 | hypothetical protein             | YP_009205836.1            | 100 | 86 | vB_EcoM_VR5    |                                                                                                      |
| 269 | 164405 | 164668 | hypothetical protein             | no significant similarity |     |    |                |                                                                                                      |
| 270 | 164734 | 164913 | hypothetical protein             | YP_009323342.1            | 100 | 58 | WG01           |                                                                                                      |
| 271 | 164920 | 165105 | hypothetical protein             | YP_009190315.1            | 100 | 54 | PEi20          | 23-45 TIGR00078 (nadC)                                                                               |
| 272 | 165095 | 165472 | Phage protein                    | YP_009190314.1            | 99  | 43 | PEi20          |                                                                                                      |
| 273 | 165472 | 165768 | Phage protein                    | YP_803078.1               | 100 | 43 | RB32           |                                                                                                      |
| 274 | 166796 | 166933 | hypothetical protein             | no significant similarity |     |    |                |                                                                                                      |
| 275 | 167097 | 167279 | hypothetical protein             | YP_009030188.1            | 90  | 63 | PS2            |                                                                                                      |
| 276 | 167261 | 167512 | hypothetical protein             | no significant similarity |     |    |                |                                                                                                      |
| 277 | 167512 | 167964 | T4-like phage protein, T4 GC1630 | YP_009190311.1            | 98  | 89 | PEi20          | 1-146 PHA02573 (30.3)<br>9-144 pfam08010 (Phage_30_3)<br>5-50 cd15457 (NADAR)<br>7-41 COG3236 (ybiA) |
| 278 | 167961 | 168197 | hypothetical protein             | YP_009190310.1            | 100 | 54 | PEi20          | YP_009288814.1                                                                                       |
| 279 | 168927 | 169460 | Phage protein                    | YP_009288814.1            | 45  | 55 | vB_KpnM_KpV477 |                                                                                                      |
| 280 | 169549 | 169743 | hypothetical protein             | YP_009190306.1            | 98  | 52 | PEi20          |                                                                                                      |
| 281 | 169740 | 169982 | hypothetical protein             | YP_009190312.1            | 72  | 41 | PEi20          |                                                                                                      |
| 282 | 170150 | 170281 | hypothetical protein             | no significant similarity |     |    |                |                                                                                                      |
| 283 | 170343 | 170579 | hypothetical protein             | YP_009190303.1            | 100 | 60 | PEi20          |                                                                                                      |

32

33

34
